# Supplementary material for: Oscillatory cAMP signaling rapidly alters H3K4 methylation
Source: Life Sci Alliance. 2019 Dec 27;3(1):e201900529. doi: 10.26508/lsa.201900529 (PMC6935296; doi:10.26508/lsa.201900529)
Supplement: Supplementary file 1 [file LSA-2019-00529_TableS1.xlsx]

## Sheet: Sheet1
			Gene	Transcripts (RCPM average)							Average
				Control_1	Control_2	Control_3	cAMP_1	cAMP_2	cAMP_3		Control	cAMP
			Kdm5c	78.46	77.52	74.55	70.2	67.73	72.31		76.84	70.08
			Kdm5a	66.85	59.28	64.98	53.67	53.46	56.92		63.7	54.68
			Kdm5b	50.16	53.79	46.13	45.2	43.37	47.23		50.03	45.27
			Kdm4a	30.23	29.26	29.27	34.44	37.78	37.46		29.59	36.56
			Kdm1a	29.48	26.5	30.29	27.05	29.37	29.47		28.76	28.63
			Kdm2a	27.26	27.49	24.4	12.28	11.73	13.08		26.38	12.36
			Kdm3b	26.78	26.64	24.5	15.83	16.27	16.34		25.97	16.15
			Kdm3a	24.61	28.29	24.47	20.78	24.13	21.04		25.79	21.99
			Kdm4c	16.87	15.6	17.25	13.75	13.18	16.9		16.57	14.61
			Kdm4b	12.66	13.6	12.92	12.82	13.26	13.74		13.06	13.27
			Kdm6b	10.57	15.15	5.63	12.6	8.61	14.09		10.45	11.77
			Kdm2b	10.07	9.64	9.79	13.01	13.03	14.13		9.84	13.39
			Kdm7a	9.16	10.78	9.3	13.41	12.92	14.78		9.75	13.7
			Kdm1b	7.11	7.24	7.21	3.86	3.87	4.03		7.18	3.92
			Kdm8	4.54	3.88	4.83	7.41	7.28	7.17		4.42	7.29
