# Supplementary material for: Oscillatory cAMP signaling rapidly alters H3K4 methylation
Source: Life Sci Alliance. 2019 Dec 27;3(1):e201900529. doi: 10.26508/lsa.201900529 (PMC6935296; doi:10.26508/lsa.201900529)
Supplement: Supplementary file 2 [file LSA-2019-00529_TableS2.xlsx]

## Sheet: Sheet1
			Quartile	Control	0.5	3.5
			Quartile 4	44.39	42.88	44.9
			Quartile 3	30.96	30.65	30.83
			Quartile 2	19.32	19.91	19.26
			Quartile 1	7.12	7.93	6.77
