# Supplementary material for: Oscillatory cAMP signaling rapidly alters H3K4 methylation
Source: Life Sci Alliance. 2019 Dec 27;3(1):e201900529. doi: 10.26508/lsa.201900529 (PMC6935296; doi:10.26508/lsa.201900529)
Supplement: Supplementary file 3 [file LSA-2019-00529_TableS3.xlsx]

## Sheet: Sheet1
		Quartile	Control	0.5	3.5
		Quartile 4	45.94	44.28	46.49
		Quartile 3	33.88	33.33	33.73
		Quartile 2	25.08	25.2	24.73
		Quartile 1	11.12	11.89	11.09
