# Supplementary material for: Oscillatory cAMP signaling rapidly alters H3K4 methylation
Source: Life Sci Alliance. 2019 Dec 27;3(1):e201900529. doi: 10.26508/lsa.201900529 (PMC6935296; doi:10.26508/lsa.201900529)
Supplement: Supplementary file 4 [file LSA-2019-00529_TableS4.xlsx]

## Sheet: Sheet1
			Gene	H3K4me3 (FPKM average)		Fold change (Control-0.5 hr)	P-value	Direction
				Control	0.5 hr
			Eln	15.4998	0.425766	0.0274691	1.2737e-14	Down
			LOC684762	29.0206	21.5723	0.743345	9.20006e-08	Down
			Samd1	15.7218	12.5675	0.799367	0.000315187	Down
			Pdss1	24.7389	19.8526	0.802488	2.2416e-05	Down
			Gmcl1	21.5613	17.5296	0.813015	0.000117551	Down
			Zfp692	37.1848	30.4862	0.819856	1.91061e-13	Down
			Stk11ip	31.8999	26.1861	0.820883	3.29336e-09	Down
			Tmem164	23.6762	19.8653	0.839038	9.80615e-05	Down
			Hist1h3b	37.2358	31.4536	0.844716	0.000764667	Down
			Hist1h1d	31.5959	27.017	0.855081	6.34875e-07	Down
			Slc25a23	24.59	21.0606	0.85647	0.00943663	Down
			Tshz3	28.5293	24.6055	0.862465	5.3357e-05	Down
			Ptges3	48.3587	41.919	0.866834	3.39016e-13	Down
			Cd99	41.0128	35.6599	0.869481	1.17628e-08	Down
			AABR07045680.1	41.0128	35.6599	0.869481	1.17628e-08	Down
			Ctgf	35.5077	31.0278	0.873835	0.000527055	Down
			Glis2	32.6337	28.6021	0.876458	1.9859e-07	Down
			Trim68	33.6135	29.6107	0.880919	0.00456025	Down
			Fpgt	28.2137	24.8653	0.881321	0.000463449	Down
			Lrriq3	28.2137	24.8653	0.881321	0.000463449	Down
